# Supplementary material for: Brazil Wave Climate from a High-Resolution Wave Hindcast
Source: MDPI journal article supplement (doi:10.3390/cli10040053), 2022-03-31
Supplement: s1 [file s1]

## Article

# Brazil Wave Climate from a High-Resolution Wave Hindcast

Camila de Sá Cotrim <sup>1</sup>, Álvaro Semedo <sup>2,3,\*</sup> and Gil Lemos <sup>3</sup>

**Citation:** de Sá Cotrim, C.; Semedo, Á.; Lemos, G. Brazil Wave Climate from a High-Resolution Wave Hindcast. *Climate* **2022**, *10*, 53. <https://doi.org/10.3390/cli10040053>

Academic Editor(s):

Received: date

Accepted: date

Published: date

**Publisher's Note:** MDPI stays neutral with regard to jurisdictional claims in published maps and institutional affiliations.

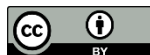

**Copyright:** © 2022 by the authors. Submitted for possible open access publication under the terms and conditions of the Creative Commons Attribution (CC BY) license (<https://creativecommons.org/licenses/by/4.0/>).

<sup>1</sup> Environmental Hydraulics Institute “IH Cantabria”, Universidad de Cantabria, 39011 Santander, Cantabria, Spain

<sup>2</sup> IHE Delft, Department of Coastal, Urban Risk and Resilience, Westvest 7, 2611, Delft, The Netherlands

<sup>3</sup> Instituto Dom Luiz, Faculty of Sciences of the University of Lisbon, Lisbon, Portugal

\* Correspondence: [a.semedo@un-ihe.org](mailto:a.semedo@un-ihe.org)

**Abstract:** A detailed climatology of ocean wind waves in the South Atlantic Ocean, based on the ERA-5 reanalysis and in a higher resolution wave hindcast (ERA-5H), both developed by the European Centre for Medium-Range Weather Forecasts, is presented. The higher resolution of the wave fields in the ERA-5H (22 km), allowed a better description of the wind sea and swell features, compared to previous global and regional studies along the Brazilian coast. Overall, it is shown that swell waves are more prevalent and carry more energy in the offshore area of the study area, while wind sea waves dominate the nearshore regions, especially along the northern coast of Brazil. The influence of different climate indices on the significant wave heights patterns is also presented, with two behavioral groups showing opposite correlations to the North Atlantic Oscillation and Southern Annular Mode than to the Southern Oscillation Index. The analysis of the decadal trends of wind sea and swell heights during the ERA-5H period (1979–2020) shows that the long-term trends of the total significant wave height in the South Atlantic Ocean are mostly due to swell events and to the wave propagation effect from Southern Ocean storms.

**Keywords:** wave analysis; ERA5; South Atlantic Ocean

## Supplementary Material

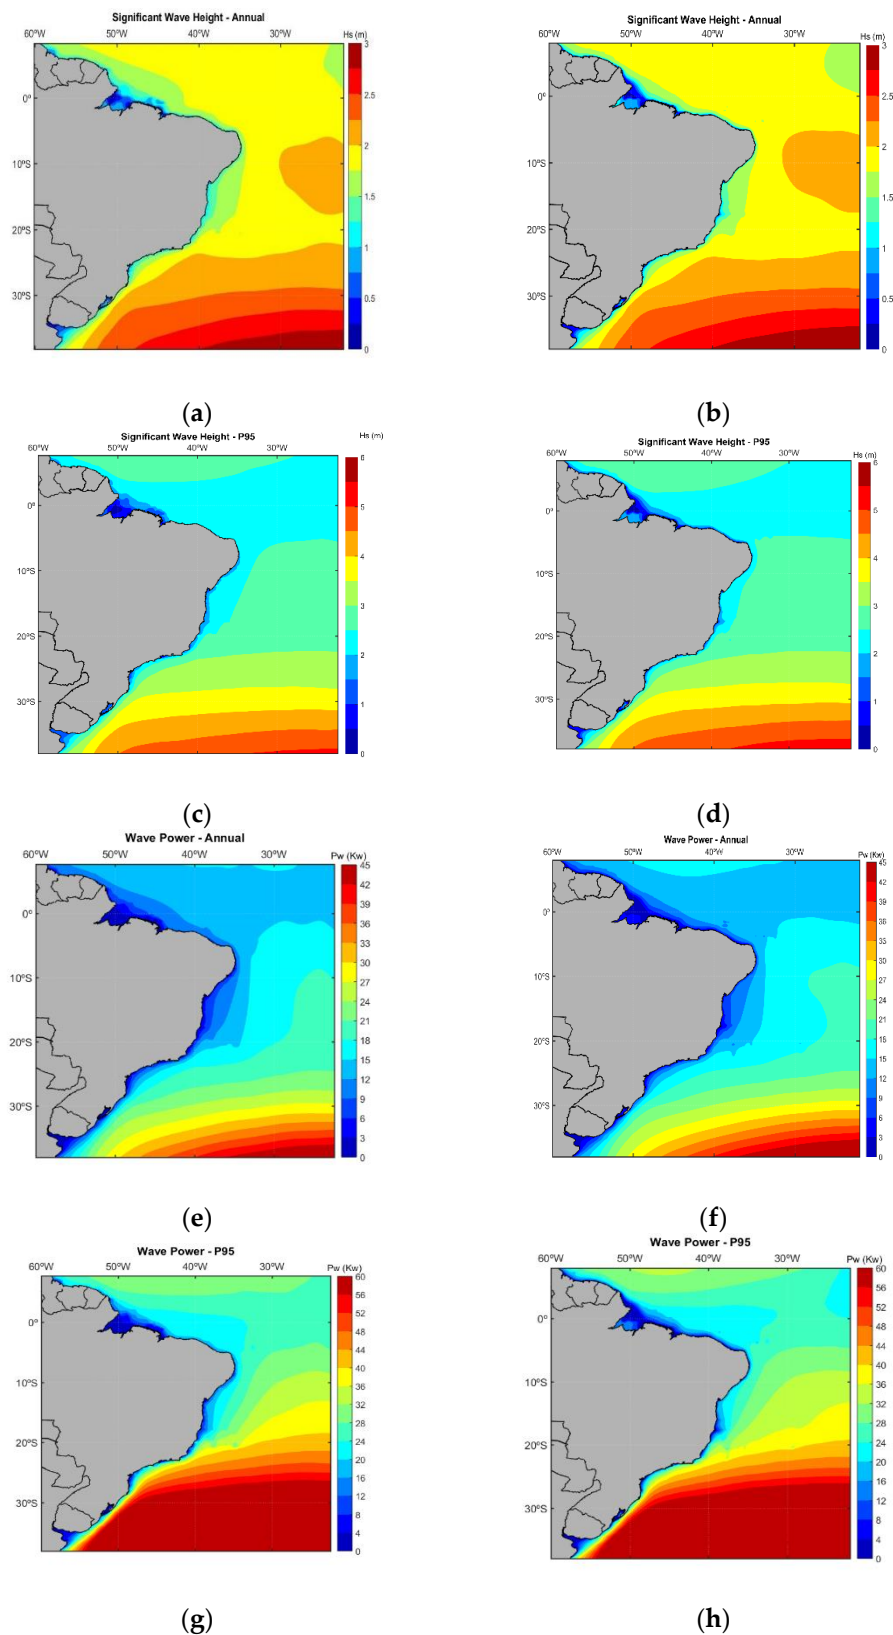

**Figure S1.** Spatial distribution of annual averages of  $H_s$  (m) (a), P95 (m) (c),  $P_w$  (Kw) (e) and P95 of  $P_w$  (Kw) (g) based on ERA5, for Brazil. Spatial distribution of annual averages of  $H_s$  (m) (b), P95 (m) (d),  $P_w$  (Kw) (f) and P95 of  $P_w$  (Kw) (h) based on ERA-5H, for Brazil.

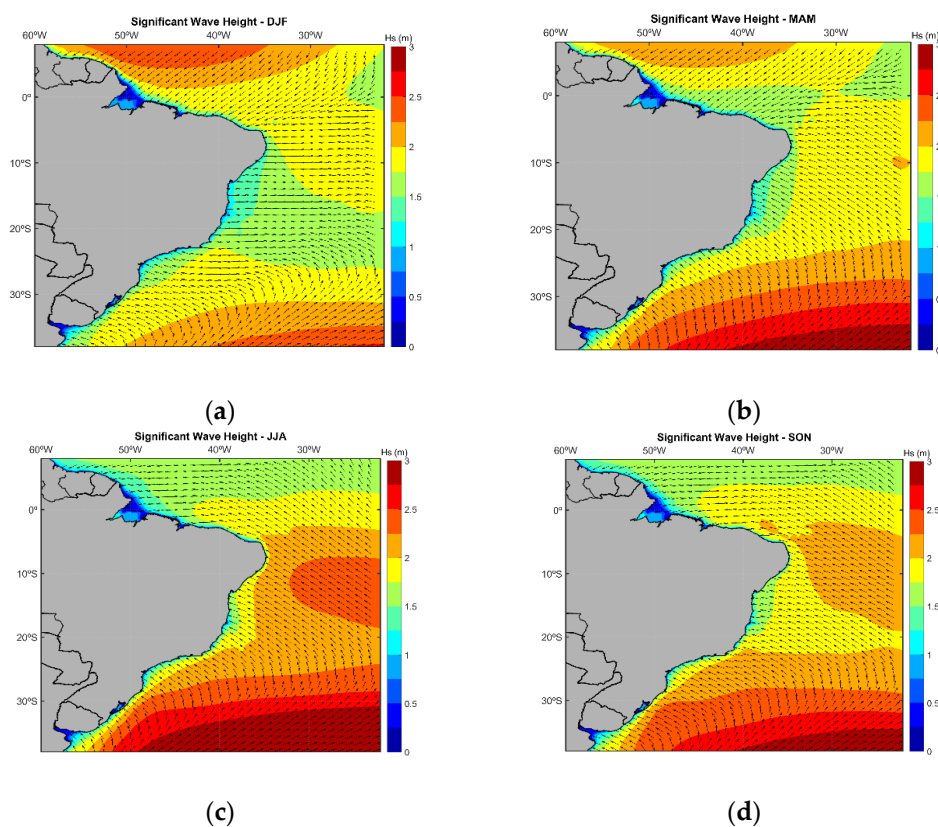

**Figure S2.** Spatial distribution of seasonal averages of  $H_s$  (m) and  $\theta_m$  ( $^\circ$ ) for (a) DJF, (b) MAM, (c) JJA, and (d) SON, for Brazil.

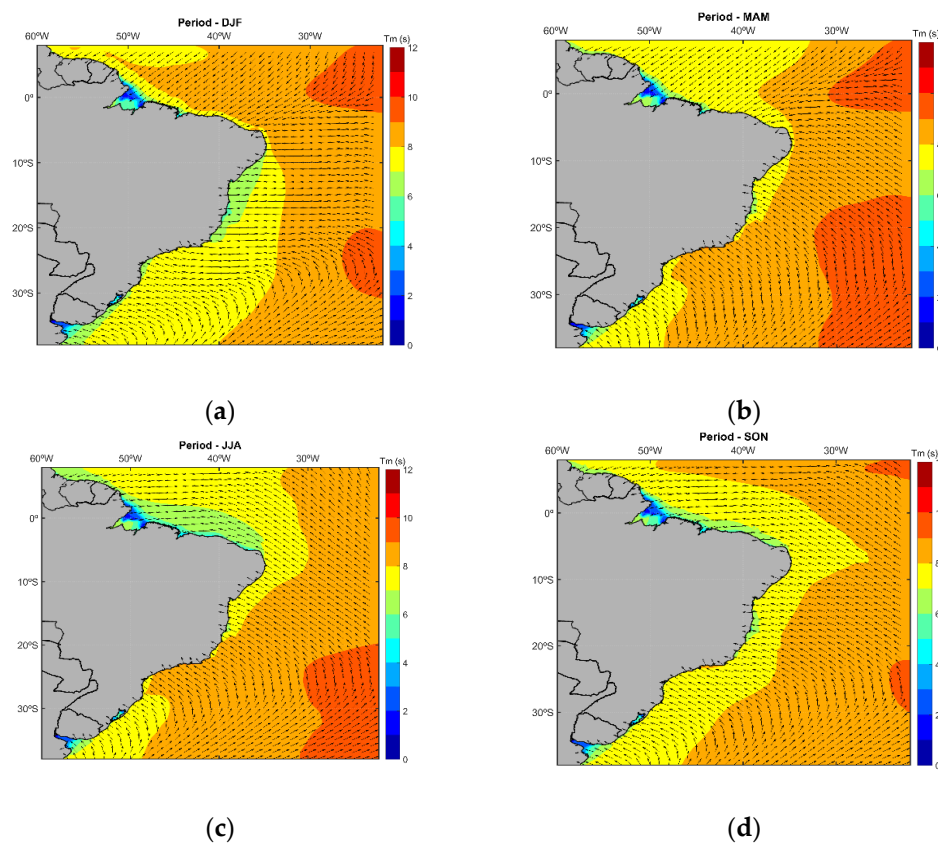

**Figure S3.** Spatial distribution of seasonal averages of  $T_m$  (s) and  $\theta_m$  ( $^\circ$ ) for (a) DJF, (b) MAM, (c) JJA, and (d) SON, for Brazil.

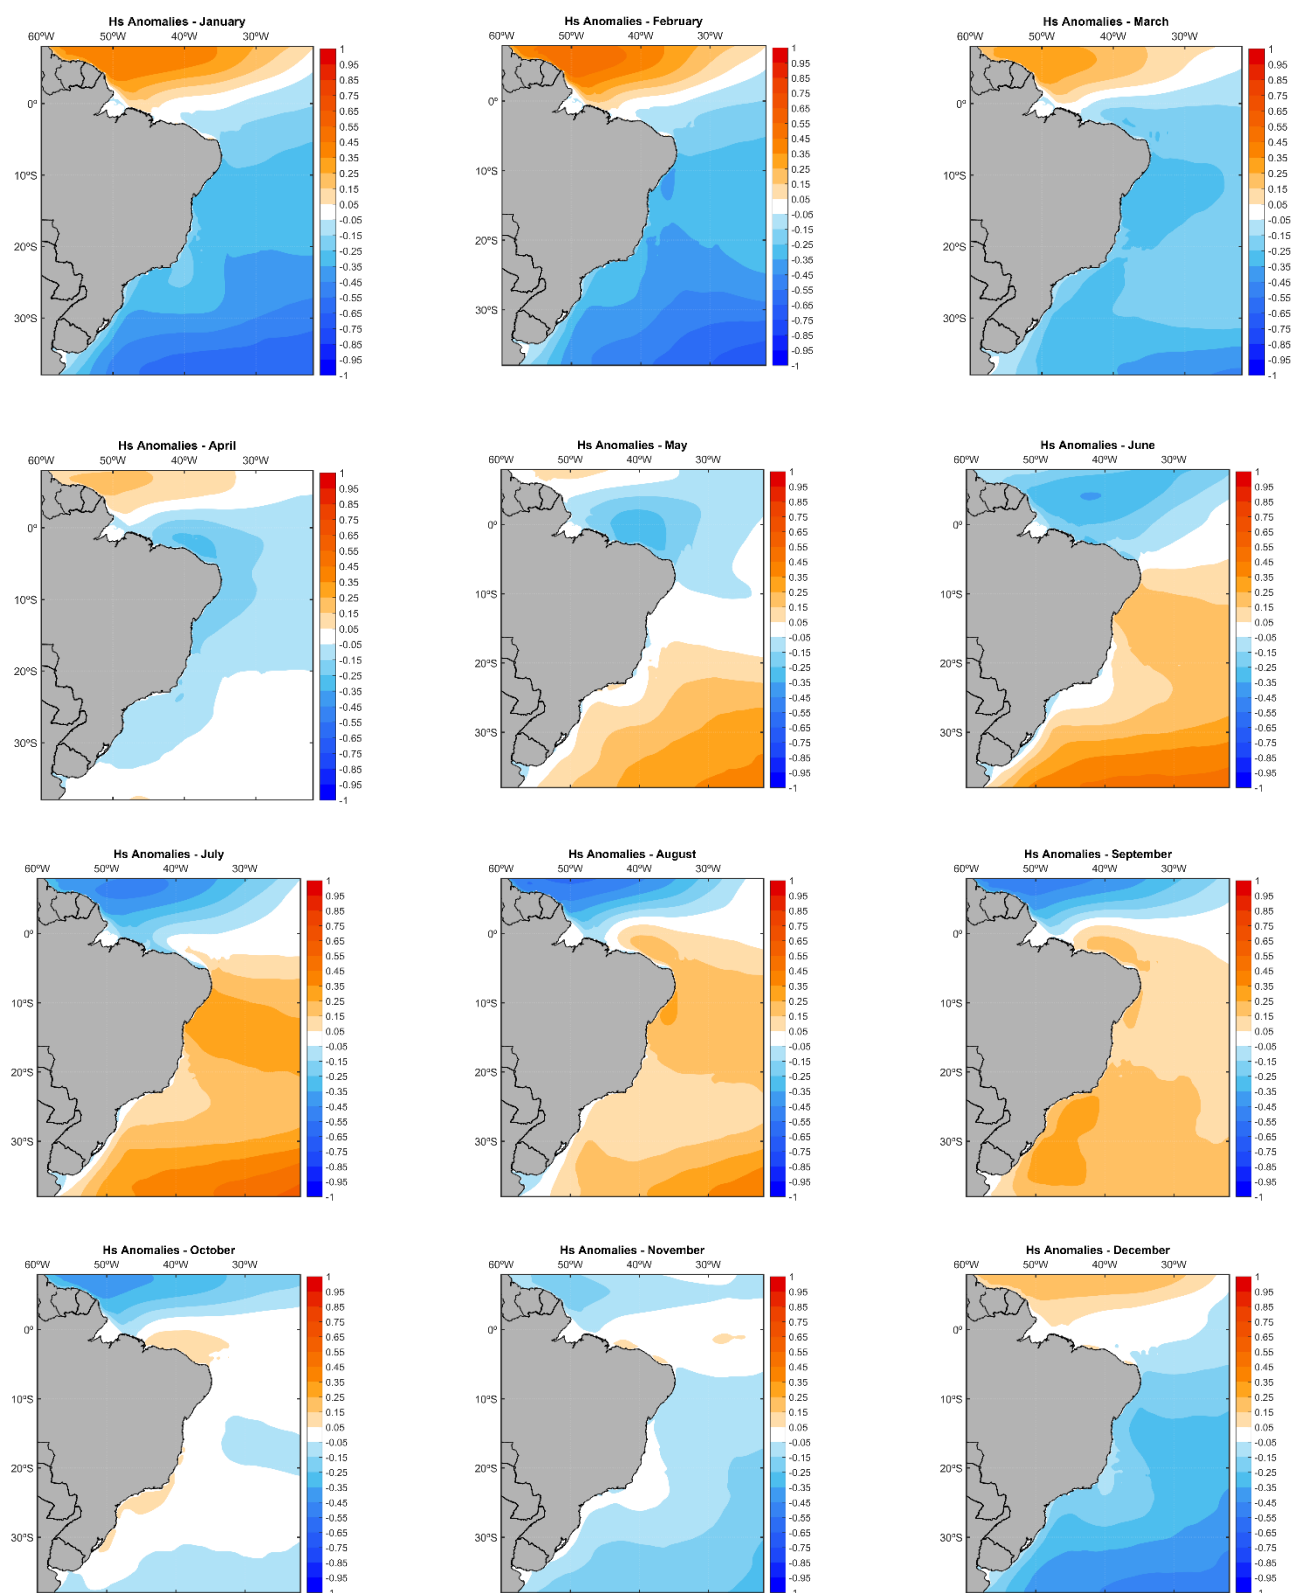

**Figure S4.** Spatial distribution of  $H_s$  anomalies (m) per month, for Brazil.
