# Supplementary material for: Brazil Wave Climate from a High-Resolution Wave Hindcast
Source: MDPI journal article supplement (doi:10.3390/cli10040053), 2022-03-31
Supplement: s1 [file s1]

Archive with 1 entries (1 files):
- climate-1635538-final-supp 4.2.pdf
